# Supplementary material
Source: ML conference proceedings conference paper supplement (https://openaccess.thecvf.com/content/CVPR2026/html/Li_Few-Shot_Hybrid_Incremental_CVPR_2026_paper.html)
Supplement: Supplementary file 1 [file Li_Few-Shot_Hybrid_Incremental_CVPR_2026_supplemental.pdf]

# Few-Shot Hybrid Incremental Learning: Continually Learning under Data Scarcity and Task Uncertainty

## Supplementary Material

### 1. More Methodological Details

Following the methodology of [1, 3, 4], we implement an autoencoder as the distribution detection module, which comprises an encoder and a decoder. Each expert is paired with a corresponding distribution detection module, which learns the feature distribution corresponding to the expert’s knowledge by minimizing the reconstruction loss, defined as:

$$\mathcal{L}_D = \sum_{l \in \mathcal{S}^L} \sum_{k \in \mathcal{S}_{l,\text{new}}^K} \|\mathbf{x}^l - \mathbf{D}_{l,k}(\mathbf{x}^l)\|^2, \quad (1)$$

where  $\mathcal{S}^L$  is the set of layers and  $\mathcal{S}_{l,\text{new}}^K$  denotes the set of newly added  $\mathbf{D}_{l,*}(\cdot)$  in layer  $l$ .

Upon receiving new data, the distribution detection module quantifies the deviation from the established feature distribution by computing the reconstruction loss. Inspired by established practices [4], we employ the  $z$ -score transformation of  $L$  rather than the raw loss, which provides a scale-invariant standardized anomaly score suitable for comparison and thresholding. The  $z$ -score is calculated as:

$$z\text{-score} = \frac{\mathcal{L}_D - \mu}{\sigma}, \quad (2)$$

where  $\mu$  and  $\sigma$  denote the mean and standard deviation of the reconstruction loss recorded from the historical data, respectively. The  $z$ -score is used to evaluate the deviation of the current data distribution from those learned by existing experts. If the  $z$ -score exceeds a predefined threshold  $\tau_z$ , a new expert is expanded to learn the new data distribution; otherwise, existing experts are reused to handle the data.

### 2. More Experimental Details

**Hyper-Parameters Configuration.** Table 1 provides the configuration settings for various hyper-parameters across different datasets in FSHIL, including incremental learning rate is for expert expansion training, fine-tuning rate for expert reuse training, and distribution rate for distribution detection training.

### 3. More Experiments and Analysis

**Comparison of Forgetting Rates with State-of-the-Art Methods.** We present a comparison of forgetting rates between our method and the competing approaches in Figure 1. The results demonstrate that our method exhibits the lowest forgetting rate across nearly all datasets, highlighting its

Table 1. Hyper-parameters configuration on five datasets in FSHIL. Incremental learning rate is for expert expansion training, fine-tuning rate for expert reuse training, and distribution rate for distribution detection training.

| Dataset     | Incremental learning rate | Fine-tuning learning rate | Distribution learning rate |
|-------------|---------------------------|---------------------------|----------------------------|
| Office-31   | 0.02                      | 0.01                      | 0.01                       |
| Office-Home | 0.02                      | 0.01                      | 0.01                       |
| iDigits     | 0.1                       | 0.1                       | 0.01                       |
| CORe50      | 0.01                      | 0.01                      | 0.01                       |
| DomainNet   | 0.01                      | 0.005                     | 0.01                       |

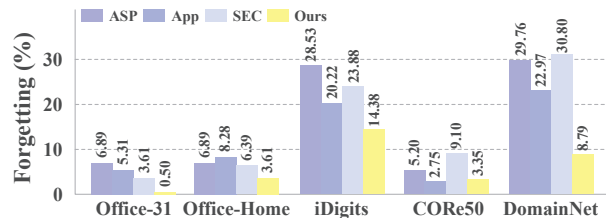

Figure 1. Forgetting comparison on five datasets in FSHIL.

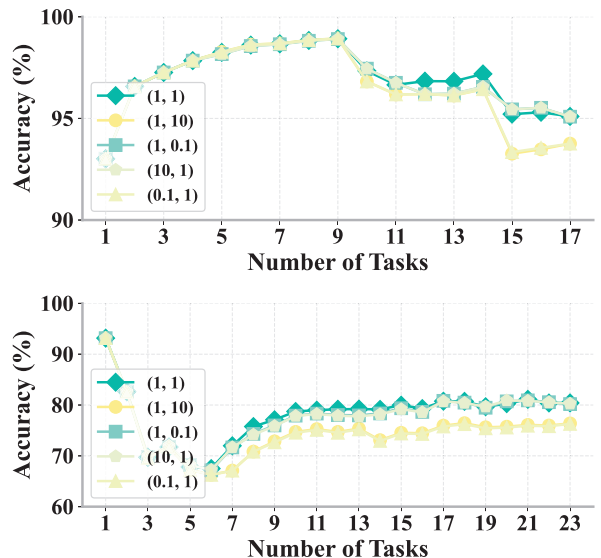

Figure 2. Ablation study of the loss coefficients  $\lambda_1$  and  $\lambda_2$  on Office-31 and CORe50 datasets.

ability to not only achieve superior accuracy but also maintain minimal forgetting.

Table 2. Ablation study of the proposed method in FSCIL and FSDIL on five datasets.

| Component    |      | Office-31    |              | Office-Home  |              | iDigits      |              | CORE50       |              | DomainNet    |              |
|--------------|------|--------------|--------------|--------------|--------------|--------------|--------------|--------------|--------------|--------------|--------------|
| CME-MoE      | SEPC | Avg          | Last         |
| <b>FSCIL</b> |      |              |              |              |              |              |              |              |              |              |              |
| ✗            | ✗    | 39.41        | 16.09        | 37.20        | 15.19        | 51.36        | 24.80        | 39.42        | 16.09        | 20.09        | 6.65         |
| ✓            | ✗    | 78.08        | 69.23        | 70.20        | 66.21        | 46.42        | 24.22        | 44.05        | 30.95        | 26.33        | 28.64        |
| ✗            | ✓    | 60.99        | 41.95        | 71.32        | 56.47        | 52.48        | 29.31        | 56.85        | 30.88        | 38.81        | 25.55        |
| ✓            | ✓    | <b>91.66</b> | <b>85.35</b> | <b>83.45</b> | <b>79.10</b> | <b>63.39</b> | <b>43.21</b> | <b>82.23</b> | <b>73.79</b> | <b>45.89</b> | <b>41.15</b> |
| <b>FSDIL</b> |      |              |              |              |              |              |              |              |              |              |              |
| ✗            | ✗    | 74.61        | 76.58        | 58.81        | 64.45        | 51.99        | 48.05        | 48.98        | 49.26        | 31.89        | 25.38        |
| ✓            | ✗    | 82.73        | 90.31        | 67.07        | 79.40        | 64.07        | 61.40        | 65.82        | 75.59        | 32.56        | 32.27        |
| ✗            | ✓    | 78.85        | 89.25        | 71.15        | 73.59        | 74.42        | 65.85        | 79.71        | 77.03        | 51.83        | 43.17        |
| ✓            | ✓    | <b>91.69</b> | <b>93.84</b> | <b>80.22</b> | <b>82.47</b> | <b>85.46</b> | <b>83.13</b> | <b>86.61</b> | <b>87.01</b> | <b>52.92</b> | <b>44.05</b> |

Table 3. Ablation study of expert initialization on CORE50 dataset.

| Expert Initialization              | Avg          | Last         |
|------------------------------------|--------------|--------------|
| Ours (w/ Random Init)              | 73.90        | 75.37        |
| <b>Ours (w/ Meta-learned Init)</b> | <b>78.27</b> | <b>80.84</b> |

**Analysis of Loss Coefficients  $\lambda_1$  and  $\lambda_2$  on More Datasets.** Figure 2 shows the ablation study of the loss coefficients  $\lambda_1$  and  $\lambda_2$  on the Office-31 and CORE50 datasets. Experimental results on additional datasets further demonstrate the robustness of these two coefficients, and the optimal performance is achieved when  $\lambda_1 = 1$  and  $\lambda_2 = 1$ .

**Ablation study of the proposed method in FSCIL and FSDIL on five datasets.** To further validate the effectiveness of our method in various scenarios, we conduct ablation studies in both FSCIL and FSDIL settings, as presented in Table 2.

**Ablation study on expert initialization.** Table 3 presents ablation studies on the initialization methods for expanded experts, demonstrating that our proposed meta-expansion strategy achieves superior performance compared to random initialization.

**Analysis on Hyper-parameter  $\tau_z$  in CME-MoE.** We conduct an ablation study on the threshold  $\tau_z$  using commonly adopted statistical thresholds [2], specifically 1.5, 2, and 3. The results are presented in Table 4.

**Analysis on the Selection of Expert Insertion Layers.** Table 5 presents the performance evaluation of selecting various expert insertion layers and allowable expansion layers. For the expert insertion layers, we investigate performance by choosing the first six layers, the intermediate six layers, and the final six layers of the model, respectively. Regarding the allowable expansion layers, we compare the results obtained by selecting the last layer, the last two layers, and the last three layers of each expert insertion layer choice. The results demonstrate that for the majority of

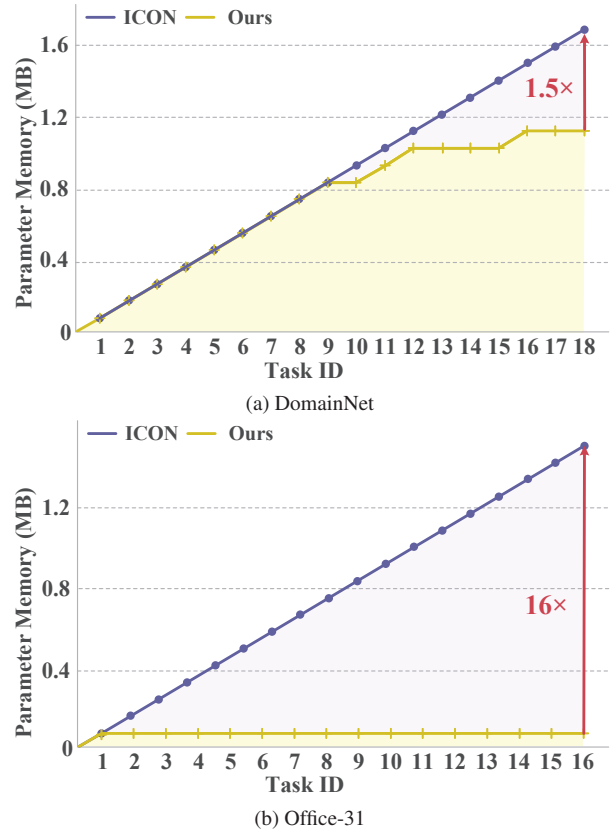

Figure 3. Memory overhead from expanded experts on DomainNet and Office-31 datasets.

datasets, optimal performance is achieved when the expert insertion layers are chosen as the first six layers and the allowable expansion layer is selected as the last layer.

**Analysis of memory overhead from expanded experts.** Figure 3 illustrates the cumulative memory overhead of the expanding experts in our proposed method during in-

Table 4. Ablation study on hyper-parameter  $\tau_z$  in CME-MoE.

| $\tau_z$ | Office-31    |              | Office-Home  |              | iDigits      |              | CORE50       |              | DomainNet    |              |
|----------|--------------|--------------|--------------|--------------|--------------|--------------|--------------|--------------|--------------|--------------|
|          | Avg          | Last         |
| 1.5      | <b>96.97</b> | <b>95.10</b> | 81.64        | 80.00        | <b>67.42</b> | <b>60.77</b> | <b>78.27</b> | <b>80.84</b> | <b>47.20</b> | <b>40.97</b> |
| 2.0      | 96.73        | 94.97        | <b>81.78</b> | <b>80.33</b> | 53.16        | 52.11        | 77.50        | 79.03        | 46.82        | 41.17        |
| 3.0      | 96.73        | 94.97        | 79.71        | 77.16        | 53.16        | 52.11        | 77.50        | 79.03        | 45.78        | 39.83        |

Table 5. Ablation study on the selection of expert insertion layers

| Expert insertion layers | Allowable expansion layers | Office-31    |              | Office-Home  |              | iDigits      |              | CORE50       |              | DomainNet    |              |
|-------------------------|----------------------------|--------------|--------------|--------------|--------------|--------------|--------------|--------------|--------------|--------------|--------------|
|                         |                            | Avg          | Last         |
| [0, 1, 2, 3, 4, 5]      | [5]                        | <b>96.97</b> | <b>95.10</b> | <b>81.64</b> | <b>80.00</b> | <b>67.42</b> | <b>60.77</b> | 78.27        | 80.84        | <b>47.20</b> | <b>40.97</b> |
| [0, 1, 2, 3, 4, 5]      | [4, 5]                     | 96.07        | 94.44        | 81.29        | 79.80        | 63.50        | 54.27        | 77.88        | 80.39        | 46.73        | 40.96        |
| [0, 1, 2, 3, 4, 5]      | [3, 4, 5]                  | 95.68        | 92.85        | 81.34        | 79.76        | 25.23        | 16.44        | 78.10        | 80.32        | 47.08        | 40.03        |
| [3, 4, 5, 6, 7, 8]      | [8]                        | 76.55        | 71.97        | 78.73        | 77.80        | 50.08        | 43.51        | <b>79.02</b> | <b>81.16</b> | 41.22        | 36.99        |
| [3, 4, 5, 6, 7, 8]      | [7, 8]                     | 47.28        | 29.16        | 78.64        | 77.21        | 50.69        | 38.81        | 70.55        | 76.84        | 41.12        | 36.29        |
| [3, 4, 5, 6, 7, 8]      | [6, 7, 8]                  | 48.87        | 30.33        | 73.41        | 74.93        | 49.65        | 40.24        | 75.24        | 79.35        | 41.58        | 36.49        |
| [6, 7, 8, 9, 10, 11]    | [11]                       | 59.70        | 76.49        | 79.17        | 78.01        | 62.44        | 52.11        | 78.00        | 79.72        | 43.81        | 38.43        |
| [6, 7, 8, 9, 10, 11]    | [10, 11]                   | 96.09        | 93.73        | 79.80        | 78.55        | 60.17        | 48.63        | 77.76        | 79.69        | 44.52        | 39.15        |
| [6, 7, 8, 9, 10, 11]    | [9, 10, 11]                | 96.03        | 93.25        | 77.04        | 75.88        | 27.44        | 23.12        | 76.84        | 78.25        | 45.86        | 40.02        |

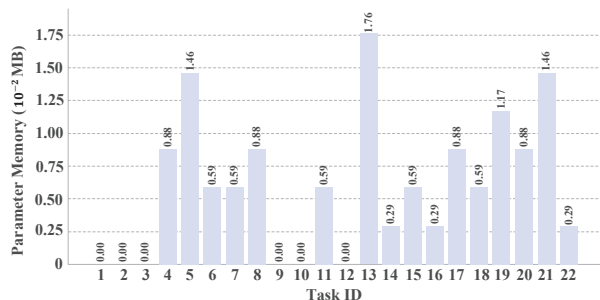

Figure 4. Memory overhead from expanded prototypes across tasks on CORE50 dataset.

cremental tasks, compared with ICON, which similarly employs an expansion strategy to address task uncertainty. We select both the distributionally complex DomainNet dataset and the simpler Office-31 dataset to fairly demonstrate the advantages of our method in terms of memory overhead.

**Analysis of memory overhead from expanded prototypes.** We illustrate the memory overhead of the expanded prototypes for each task on the CORE50 dataset in Fig. 4. It can be observed that the memory overhead from prototype expansion is negligible, with a maximum of merely  $1.76 \times 10^{-2}$  MB.

#### 4. Training Pseudocode

The algorithmic procedure of the proposed method is detailed in Algorithm 1.

---

**Algorithm 1: Few-Shot Hybrid Incremental Learning with CME-MoE and SEPC**

---

**Input:** Sequential datasets  $\{(\mathcal{X}^t, \mathcal{Y}^t)\}_{t=0}^T$  for tasks  $\{t_1, \dots, t_T\}$

**Output:** Continually learned model under data scarcity and task uncertainty

```
1 # Step 1: Initialization
2 Initialize expert  $\mathbf{E}_{l,0}(\cdot)$  and distribution detection module  $\mathbf{D}_{l,0}(\cdot)$  in the MLP sub-layer of the Transformer layer
    $l \in \mathcal{S}^L$ 
3 # Step 2: Pre-training
4 Meta-optimization for  $\mathbf{E}_{l,0}(\cdot)$  and  $\mathbf{D}_{l,0}(\cdot)$  with parameter set  $\Theta_{l,0} = \{\Theta_{l,0}^e, \Theta_{l,0}^d\}$  using  $(\mathcal{X}^0, \mathcal{Y}^0)$ :
    $\min_{\Theta_{l,0}} \mathbb{E}_{\mathcal{M}_i \sim p(\mathcal{M})} [\mathcal{L}_{\mathcal{M}_i}^{\text{query}}(\Theta_{l,0}) - \alpha \nabla_{\Theta_{l,0}} \mathcal{L}_{\mathcal{M}_i}^{\text{support}}(\Theta_{l,0})]$ 
5 // where  $\mathcal{L}_{\mathcal{M}_i}^{\text{support}}$  and  $\mathcal{L}_{\mathcal{M}_i}^{\text{query}}$  denote the losses on the support and query sets of task  $\mathcal{M}_i$ , respectively
6 # Step 3: Few-shot hybrid incremental learning
7 for each task  $t_T$  do
8   while not converged do
9     Sample mini-batch  $\{(\hat{\mathbf{x}}_i, \hat{\mathbf{y}}_i)\}_{i=1}^B$  from  $(\mathcal{X}^t, \mathcal{Y}^t)$ 
10    // CME-MoE: Conditional Meta-Expanding Mixture-of-Experts
11    # Step 3.1: Expert reuse versus expansion
12    Compute distribution error for each expert  $l$  and layer  $k$ :  $\mathbb{E}_{l,k}^D = \|\mathbf{x}_i^l - \mathbf{D}_{l,k}(\mathbf{x}_i^l)\|^2$ 
13    Compute the z-score based on  $\mathbb{E}_{l,k}^D$ 
14    if z-score exceeds threshold then
15      # Step 3.1.1: Expert reuse
16      Compute gating weights for existing experts:  $\mathbf{m} = \text{Softmax}(\mathbf{G}(\mathbf{x}_i^l))$ ,  $\mathbf{m} = \{m_1, \dots, m_{K_l}\}$ 
17      // where  $\mathbf{G}(\cdot)$  and  $\text{Softmax}$  denote a learned gating network and softmax function, respectively
18      Reuse existing experts by aggregating the most relevant expertise:  $\mathbf{y}_i^l = \sum_{i \in \{1, \dots, K_l\}} m_i \cdot \mathbf{E}_{l,i}(\mathbf{x}_i^l)$ 
19    end
20    else
21      # Step 3.1.2: Expert meta-expansion
22      Expand experts via meta-expansion:  $\Theta_{l,K_l+1}^e \leftarrow \Theta_{l,0}^e$ ,  $\Theta_{l,K_l+1}^d \leftarrow \Theta_{l,0}^d$ 
23    end
24    // SEPC: Self-Expanding Prototype Classifier
25    # Step 3.2: Performance monitoring
26    Compute the classifier expansion threshold of each class  $c$  over its  $n$  incremental visits:
        $\mathcal{T}_c = \max(\overline{\text{Acc}}(c, n) \cdot (1 - \beta), \tau_{\min})$ 
27    // where  $\beta \in [0, 1)$  is the tolerance for performance decay and  $\tau_{\min}$  is the minimum acceptable performance
28    if performance exceeds threshold  $\mathcal{T}_c$  then
29      # Step 3.2.1: Classifier expansion
30      Compute new prototype for the each underperforming class  $c$ :  $\mathbf{p}_{c,j} = \frac{1}{|\mathcal{S}^c|} \sum_{(\hat{\mathbf{x}}_i, c) \in \mathcal{S}^c} \mathbf{F}(\hat{\mathbf{x}}_i)$ 
31      // where  $\mathbf{F}(\cdot)$  denotes the model backbone,  $\hat{\mathbf{x}}_i$  is the original sample, and  $j$  indexes the prototype within
       the  $c$ -th class
32      Add the expanded prototype  $\mathbf{p}_{c,j}$  to the prototype set  $\mathcal{S}^{P_c}$ 
33    end
34    else
35      # Step 3.2.2: Classifier reuse
36      Compute each logit  $\text{Logit}_c$  as the maximum similarity between  $\mathbf{f}$  and prototypes  $\mathbf{p}_{c,j} \in \mathcal{S}^{P_c}$  for class  $c$ :
          $\text{Logit}_c = \max_j \text{sim}(\mathbf{f}, \mathbf{p}_{c,j})$ ,  $\mathbf{p}_{c,j} \in \mathcal{S}^{P_c}$ 
37      Compute the final prediction  $\hat{c}$  as the class label corresponding to the maximum logit:
          $\hat{c} = \arg \max_{c \in \{1, \dots, C\}} \text{Logit}_c$ 
38    end
39    # Step 3.3: Loss composition and update
40    Compute loss  $\mathcal{L}_D$  for distribution detection modules, and  $\mathcal{L}_{CE}$  and  $\mathcal{L}_{PD}$  for experts and classifier:
        $\mathcal{L}_{\text{total}} = \mathcal{L}_D + \lambda_1 \mathcal{L}_{CE} + \lambda_2 \mathcal{L}_{PD}$ 
41    Backpropagate and update experts, distribution detection modules and classifier parameters
42  end
43 end
```

---

## References

- [1] Geoffrey E Hinton and Ruslan R Salakhutdinov. Reducing the dimensionality of data with neural networks. *science*, 313(5786):504–507, 2006. [1](#)
- [2] Robert V Hogg, Elliot A Tanis, and Dale L Zimmerman. *Probability and statistical inference*. Macmillan New York, 1977. [2](#)
- [3] Minqi Jiang, Songqiao Han, and Hailiang Huang. Anomaly detection with score distribution discrimination. In *Proceedings of the 29th ACM SIGKDD Conference on Knowledge Discovery and Data Mining*, pages 984–996, 2023. [1](#)
- [4] Huiyi Wang, Haodong Lu, Lina Yao, and Dong Gong. Self-expansion of pre-trained models with mixture of adapters for continual learning. In *Proceedings of the Computer Vision and Pattern Recognition Conference*, pages 10087–10098, 2025. [1](#)
